# Supplementary material for: Annexin A2 Is a Natural Extrahepatic Inhibitor of the PCSK9-Induced LDL Receptor Degradation
Source: PubMed Central journal article supplement (PMC3407131; doi:10.1371/journal.pone.0041865), 2012-07-27

# Supplemental Figure S4

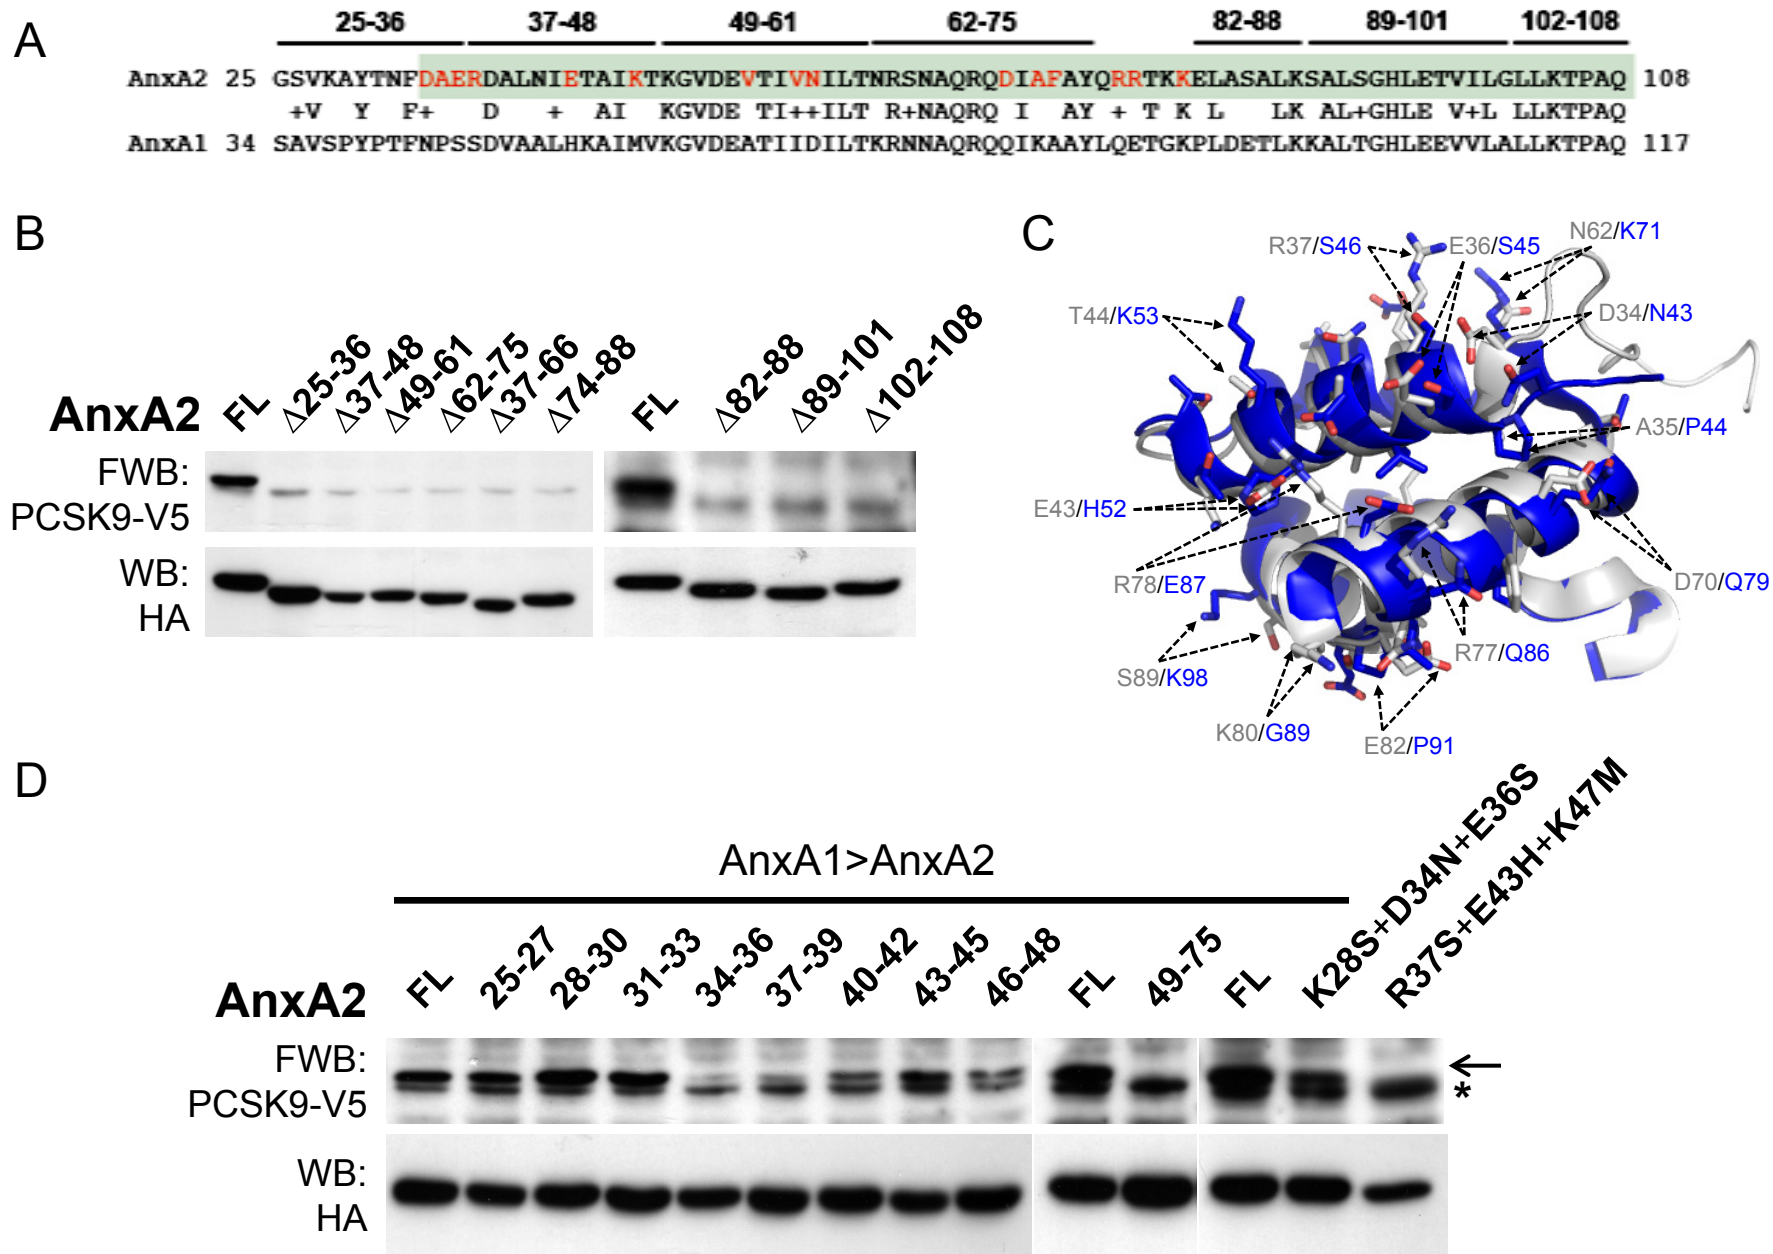

Supplement: pone.0041865.s004.pdf [file pone.0041865.s004.pdf]
