# Supplementary material for: Annexin A2 Is a Natural Extrahepatic Inhibitor of the PCSK9-Induced LDL Receptor Degradation
Source: PubMed Central journal article supplement (PMC3407131; doi:10.1371/journal.pone.0041865), 2012-07-27
Supplement: pone.0041865.s006.pdf [file pone.0041865.s006.pdf]

Table S1. Oligonucleotides used for site-directed mutagenesis of AnxA2.

| Mutants         | Sense                                                                 | Antisense                                                        |
|-----------------|-----------------------------------------------------------------------|------------------------------------------------------------------|
| Δ25-36          | 5' - CCAAGTGCATATCGGGATGCTTTGAACATTGAAAC-3'                           | 5' - CATCCCATATGCACTTGGGGGTGT-3'                                 |
| Δ37-48          | 5' - GATGCTGAGAAAGGTGTGGATGAGGTCAC-3'                                 | 5' - CCACACCTTTCTCAGCATCAAAGTTAGTATAGGC-3'                       |
| Δ49-61          | 5' - CATCAAGACCAACCCGACCAATGCAC-3'                                    | 5' - CTGCGGTTGGTCTTGATGGCTGTTTCAATG-3'                           |
| Δ62-75          | 5' - CAACATTTTGACCAGAAGGACCAAAAAGGAACCTTGC-3'                         | 5' - GGTCCCTCTGGTCAAAATGTTGACAATGGTG-3'                          |
| Δ37-66          | 5' - GATGCTGAGCAGAGACAGGATATTGCCTTC-3'                                | 5' - CCTGTCTCTGCTCAGCATCAAAGTTAGTATAGGC-3'                       |
| Δ74-88          | 5' - GCCTTCTCAGCCTTATCTGGCCAC-3'                                      | 5' - CCAGATAAGGCTGAGAAGGCAATATCCTGTCTC-3'                        |
| Δ82-88          | 5' - GAAGGACCAAAAAGTCAGCCTTATCTGGCCAC-3'                              | 5' - GATAAGGCTGACTTTTTGGTCTTCTCTGGTAGG-3'                        |
| Δ89-101         | 5' - CAGCACTGAAGCTATTGAAGACACCTGCTCAG-3'                              | 5' - GTCTTCAATAGCTTCAGTGTGATGCAAGTTC-3'                          |
| Δ102-108        | 5' - GATTTTGGGCTATGACGCTTCTGAGCTAAAAG-3'                              | 5' - GAAGCGTCATAGCCCAAAATCACCGTCTC-3'                            |
| > 25-27 (AnxA1) | 5' - CTACACCCCAAGTGCATATAGCGCTGTC-3'                                  | 5' - GACAGCGCTATATGCACTTGGGGGTGTAG-3'                            |
| > 28-30 (AnxA1) | 5' - GGGTCTGTCAGTCCCTATACTAACTTTG-3'                                  | 5' - CAAAGTTAGTATAGGGACTGACAGACCC-3'                             |
| > 31-33 (AnxA1) | 5' - GTCAAAAGCCTATCCTACCTTTGATGCTGAG-3'                               | 5' - CTCAGCATCAAAGGTAGGATAGGCTTTGAC-3'                           |
| > 34-36 (AnxA1) | 5' - CTATACTAACTTTAATCCTAGTCGGGATGCTTTG-3'                            | 5' - CAAAGCATCCCAGACTAGGATTAAGTTAGTATAG-3'                       |
| > 37-39 (AnxA1) | 5' - CTTTGATGCTGAGAGCGATGTTTGAACATTG-3'                               | 5' - CAATGTTCAAACATCGCTCTCAGCATCAAAG-3'                          |
| > 40-42 (AnxA1) | 5' - CGGGATGCTGCGGCCCTTGAACAGCCATC-3'                                 | 5' - GATGGCTGTTTCAAGGCCCGCAGCATCCCG-3'                           |
| > 43-45 (AnxA1) | 5' - CTTTGAACATTCACAAAGCCATCAAGACC-3'                                 | 5' - GGTCTTGATGGCTTTGTGAATGTTCAAAG-3'                            |
| > 46-48 (AnxA1) | 5' - GAAACAGCCATCATGGTCAAAGGTGTGG-3'                                  | 5' - CCACACCTTTGACCATGATGGCTGTTTC-3'                             |
| > 49-75 (AnxA1) | 5' - AACAAATGCACAGAGACAGCAAATTAAGCCGCTACCAGAGAAGGACCAAAAAGGAACCTTG-3' | 5' - CTGGTAGGCGGCTTTAATTTGCTGTCTCTGTGCATGTTGCGTTTGGTCAAATGTGC-3' |
| > 49-81 (AnxA1) | 5' - GGCCACCATTATCGACATTTTGACCAACCGCAGCAATGCACAGAG-3'                 | 5' - CAAAATGTCGATAATGGTGGCCTCATCCACACCTTTGGTC-3'                 |
| > 62-75 (AnxA1) | 5' - AAACGCAACAATGCACAGAGACAGCAGATTAAGGCCGCTACCAGAGAAGGACC-3'         | 5' - GGCTTAATCTGCTGTCTCTGTGCATGTTGCGTTTGGTCAAATGTTGACAATGGTG-3'  |
| K28S+D34N+E36S  | 5' - TCAGCCTATACTAACTTTAATGCTTCGCGGGATGCTTTGAACATTG-3'                | 5' - CGAAGCATTAAGTTAGTATAGGCTGAGACAGACCCATATGCACTTG-3'           |
| R37S+E43H+K47M  | 5' - CGGATGCTTTGAACATTCACACAGCCATCATGACCAAGGTGTGGATGAG-3'             | 5' - CATGATGGCTGTGTAATGTTCAAAGCATCCGACTCAGCATCAAAGTTAGTATAGGC-3' |
| V98L            | 5' - GGAGACGCTGATTTTGGCCTATTG-3'                                      | 5' - CAATAGGCCCAAAATCAGCGTCTCC-3'                                |
