# Supplementary material for: Annexin A2 Is a Natural Extrahepatic Inhibitor of the PCSK9-Induced LDL Receptor Degradation
Source: PubMed Central journal article supplement (PMC3407131; doi:10.1371/journal.pone.0041865), 2012-07-27
Supplement: pone.0041865.s007.pdf [file pone.0041865.s007.pdf]

Table S2. Physical characteristics, fasting plasma lipids, and PCSK9 levels of 43 healthy volunteers (A) and 31 hypercholesterolemic subjects treated with statins (B) based on the V98L genotype. (mean  $\pm$  SD. P-values were obtained using a two-tailed Student's t-test. \*, p=0.01. \*\*, p=0.02. \*\*\*, p=0,001).

A

|                          | AnxA2 V98L Non-carriers<br>(min-max)<br>n = 32 | AnxA2 V98L heterozygotes<br>(min-max) n = 10 | AnxA2 V98L homozygotes<br>(n = 1) |
|--------------------------|------------------------------------------------|----------------------------------------------|-----------------------------------|
| Age (years)              | 43 $\pm$ 15 (21–76)                            | 45 $\pm$ 14 (25–67)                          | 23                                |
| BMI (kg/m <sup>2</sup> ) | 25.1 $\pm$ 3.9 (19.5–35.2)                     | 23.7 $\pm$ 2.8 (18.9–28.1)                   | 20.6                              |
| PCSK9 (ng/ml)            | 80.4 $\pm$ 42.2 (25.9–190.2)                   | *56.1 $\pm$ 20.9 (39.5–96.8)                 | 38.0                              |
| TC (mmol/L)              | 5.37 $\pm$ 0.82 (3.82–7.02)                    | 5.66 $\pm$ 1.79 (3.01-8.43)                  | 3.79                              |
| TG (mmol/L)              | 1.37 $\pm$ 0.89 (0.47–3.74)                    | 1.43 $\pm$ 0.71 (0.45–2.65)                  | 0.53                              |
| LDLc (mmol/L)            | 3.11 $\pm$ 0.84 (1.76–5.21)                    | 3.34 $\pm$ 1.43 (1.17–4.83)                  | 1.94                              |
| HDLc (mmol/L)            | 1.62 $\pm$ 0.45 (0.87–2.58)                    | 1.49 $\pm$ 0.29 (1.08–1.99)                  | 1.61                              |

B

|                          | AnxA2 V98L Non-carriers<br>(min-max)<br>n = 25 | AnxA2 V98L heterozygotes<br>(min-max) n = 5 | AnxA2 V98L homozygotes<br>(n = 1) |
|--------------------------|------------------------------------------------|---------------------------------------------|-----------------------------------|
| Age (years)              | 55 $\pm$ 17 (19–86)                            | 65 $\pm$ 18 (40–82)                         | 59                                |
| BMI (kg/m <sup>2</sup> ) | 26.0 $\pm$ 3.9 (19.5–33.1)                     | 27.1 $\pm$ 5.8 (19.9–33.1)                  | 24.4                              |
| PCSK9 (ng/ml)            | 106.4 $\pm$ 37.8 (36.5–165.4)                  | 112.1 $\pm$ 12.3 (97.7–123.6)               | 41.5                              |
| TC (mmol/L)              | 4.93 $\pm$ 0.95 (3.26–7.72)                    | **4.47 $\pm$ 0.25 (4.08–4.71)               | 3.77                              |
| TG (mmol/L)              | 1.61 $\pm$ 1.20 (0.54–5.65)                    | 1.67 $\pm$ 0.88 (0.93–3.00)                 | 1.35                              |
| LDLc (mmol/L)            | 2.89 $\pm$ 0.74 (1.62–4.76)                    | ***2.27 $\pm$ 0.18 (2.06–2.48)              | 2.06                              |
| HDLc (mmol/L)            | 1.35 $\pm$ 0.38 (0.85–2.16)                    | 1.38 $\pm$ 0.53 (0.97–2.20)                 | 1.09                              |
